# Supplementary material
Source: HighWire-hosted journal article supplement (http://thorax.bmjjournals.com/highwire/filestream/174093/field_highwire_adjunct_files/1/633259webonlyapp2.pdf)

# Figure S1

## Ai

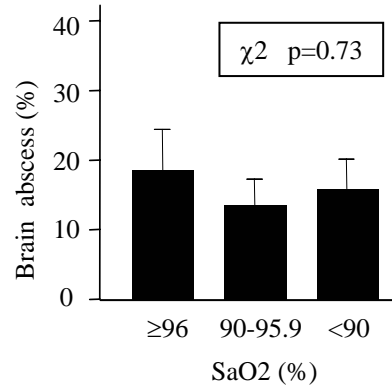

## ii

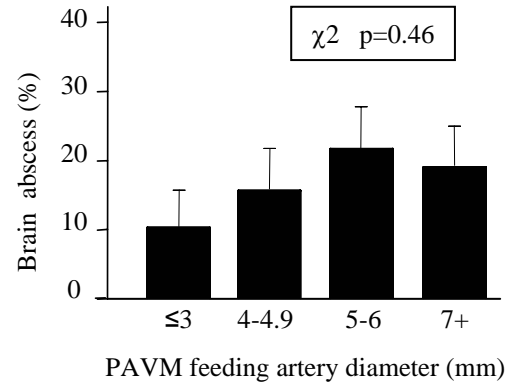

## Bi

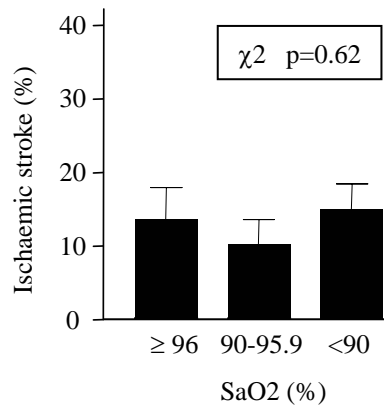

## ii

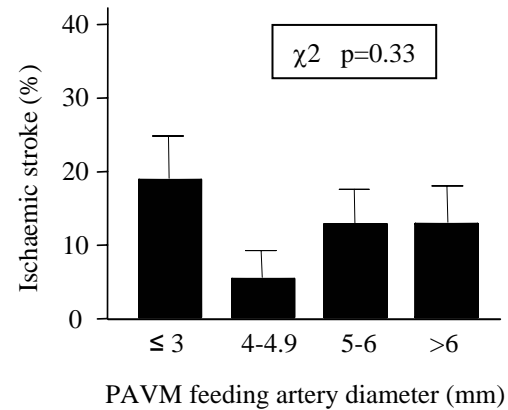

Supplement: 633259webonlyapp2.pdf [file 633259webonlyapp2.pdf]
